# Supplementary material
Source: Springer Nature journal article supplement (https://www.springermedizin.de/resource/supplementary/13002_2013_342_MOESM6_ESM.pdf/9627662)
Supplement: MOESM6 [file 9627662]

**(b)Eco+Cult =11.57%**

**Ecological**

$p = 0.001$

**SocCultEco**

**Management**

**a = 21.28%**

$p = 0.56$

**c = 32.63%**

$p = 0.66$

**?**

**Unexplained**

**d = 34.50%**

$p=0.98$
